# Supplementary material for: Soy Isoflavones Induce Feminization of Japanese Eel (Anguilla japonica)
Source: MDPI journal article supplement (doi:10.3390/ijms24010396), 2022-12-26
Supplement: s1 [file s1]

# **Soy isoflavones induce feminization of Japanese eel (*Anguilla japonica*)**

## ***Supplementary Materials***

**Hiroyuki Inaba<sup>1,2,3</sup>, Yuzo Iwata<sup>1,4</sup>, Takashi Suzuki<sup>1,5</sup>, Moemi Horiuchi<sup>6</sup>, Ryohei Surugaya<sup>6</sup>, Shigeho Ijiri<sup>6</sup>, Ai Uchiyama<sup>7</sup>, Ryoko Takano<sup>7</sup>, Seiji Hara<sup>2,8</sup>, Takashi Yazawa<sup>9</sup> & Takeshi Kitano<sup>2\*</sup>**

**Supplementary Table S1. Differentially expressed genes with FPKM values that changed by >10-fold in E2- and genistein-treated eels compared with the genes of control eels.**

|                                      | No.                                | Tracking_id  | Gene name                                                                            | STRENG protein                                                        | GO term                                                                                                                                                                                           |                                                                                                                                                                                                   |
|--------------------------------------|------------------------------------|--------------|--------------------------------------------------------------------------------------|-----------------------------------------------------------------------|---------------------------------------------------------------------------------------------------------------------------------------------------------------------------------------------------|---------------------------------------------------------------------------------------------------------------------------------------------------------------------------------------------------|
| I2<br>up-regulated<br>genes          | 1                                  | MSTRG10868.3 | transcription elongation regulator 1-like isoform X4                                 | LOC797475                                                             | DNA template transcription; F transcription complex assembly; F RNA polymerase binding                                                                                                            |                                                                                                                                                                                                   |
|                                      | 2                                  | MSTRG10827.3 | RNA-binding 14b isoform X3                                                           | thc14b                                                                | F RNA binding                                                                                                                                                                                     |                                                                                                                                                                                                   |
|                                      | 3                                  | MSTRG10864.2 | 3p-lysine mediated activity receptor like                                            | hmt49                                                                 | Cytoskeleton                                                                                                                                                                                      |                                                                                                                                                                                                   |
|                                      | 4                                  | MSTRG10884.2 | TBC1 domain family member 9b isoform X2                                              | thc149                                                                | F calcium ion binding                                                                                                                                                                             |                                                                                                                                                                                                   |
|                                      | 5                                  | MSTRG1072.2  | apoptotic chromatin condensation inducer in the nucleus-like                         |                                                                       | F protein transmembrane activity                                                                                                                                                                  |                                                                                                                                                                                                   |
|                                      | 6                                  | MSTRG11947.1 | Y-box-binding 2 isoform X2                                                           | ybb1                                                                  | F nucleic acid binding                                                                                                                                                                            |                                                                                                                                                                                                   |
|                                      | 7                                  | MSTRG11971.1 | histidine-N-acetyl transferase-like                                                  | aid140                                                                | F acetyltransferase activity                                                                                                                                                                      |                                                                                                                                                                                                   |
|                                      | 8                                  | MSTRG12631.4 | RNA-binding 47-like isoform X2                                                       | RBM47                                                                 | F RNA binding; C nucleus                                                                                                                                                                          |                                                                                                                                                                                                   |
|                                      | 9                                  | MSTRG11158.1 | ATP-dependent DNA helicas Q1 isoform X2                                              | rmn47                                                                 | F DNA replication; F DNA repair; F DNA recombination; F helicase activity; F catalytic activity; acting on DNA; F ATP-ATP-dependent activity; C nucleus                                           |                                                                                                                                                                                                   |
|                                      | 10                                 | MSTRG12442.2 | hypophysect protein                                                                  | qpps                                                                  | F cytoplasmic vesicle                                                                                                                                                                             |                                                                                                                                                                                                   |
|                                      | 11                                 | MSTRG12927.2 | 39S ribosomal protein L2, mitochondrial                                              | MRPL2                                                                 | F mitochondrial gene expression; F RNA binding; F structured molecule activity; C mitochondrion; C cytosol                                                                                        |                                                                                                                                                                                                   |
|                                      | 12                                 | MSTRG14896.1 | GMP-dependent 7,5'-cyclic phosphodiesterase isoform X4                               | p4dc2a                                                                | F nucleic acid metabolic process; F protein modification process; F transmembrane activity; C cytosol                                                                                             |                                                                                                                                                                                                   |
|                                      | 13                                 | MSTRG14952.2 | L-aminoadipate-oxidomethyl de dehydrogenase-phosphoantithetyl transferase isoform X3 | aaodyp1                                                               | F amino acid metabolic process; F cell differentiation; F neuronal structure development; F transmembrane activity; C cytoskeleton; C nucleus                                                     |                                                                                                                                                                                                   |
|                                      | 14                                 | MSTRG10421.2 | possible VLA-like isoform X3                                                         | VRG1                                                                  | F protein modification process; F cell differentiation; F neuronal structure development; F transmembrane activity; C cytoskeleton; C nucleus                                                     |                                                                                                                                                                                                   |
|                                      | 15                                 | MSTRG15005.3 | probable G-coupled receptor 171                                                      | GPR171                                                                | F protein modification process; F cell differentiation; F neuronal structure development; F transmembrane activity; C cytoskeleton; C nucleus                                                     |                                                                                                                                                                                                   |
|                                      | 16                                 | MSTRG15282.1 | 5'-N-capsid-associated FLD1                                                          | pld3                                                                  | F regulation of DNA template transcription; F neuronal structure development; F RNA binding; F catalytic activity; F transcription regulation activity; C nucleus                                 |                                                                                                                                                                                                   |
|                                      | 17                                 | MSTRG16127.3 | strong stimulation factor subunit 1                                                  | cuf1                                                                  | F RNA metabolic process; F RNA binding; F neuronal structure development activity; C nucleus                                                                                                      |                                                                                                                                                                                                   |
|                                      | 18                                 | MSTRG16702.2 | ...-NA...                                                                            |                                                                       |                                                                                                                                                                                                   |                                                                                                                                                                                                   |
|                                      | 19                                 | MSTRG17137.2 | ...-NA...                                                                            |                                                                       |                                                                                                                                                                                                   |                                                                                                                                                                                                   |
|                                      | 20                                 | MSTRG18465.3 | nucleic factor related to kappa-B binding protein isoform X2                         | NFKB1                                                                 | C nuclear transmembrane                                                                                                                                                                           |                                                                                                                                                                                                   |
|                                      | 21                                 | MSTRG16312.2 | transcriptional regulator ATRX-like                                                  | atr                                                                   | F transcription                                                                                                                                                                                   |                                                                                                                                                                                                   |
|                                      | 22                                 | MSTRG20405.1 | quonine 1RNA-oligonucleotide transferase catalytic subunit 1 isoform X1              | qon1                                                                  | F RNA metabolic process; F transmembrane activity; F catalytic activity; acting on RNA; C mitochondrion                                                                                           |                                                                                                                                                                                                   |
|                                      | 23                                 | MSTRG20758.1 | class II basic helix-loop-helix 41 isoform X2                                        | Mbhl41                                                                | F regulation of DNA template transcription; F cell differentiation; F neuronal structure development; F DNA binding; F transcription regulation activity                                          |                                                                                                                                                                                                   |
|                                      | 24                                 | MSTRG21449.1 | F-acyltransferase alpha                                                              | pvalb1                                                                | F protein ion binding                                                                                                                                                                             |                                                                                                                                                                                                   |
|                                      | 25                                 | MSTRG21913.2 | epsin-3-like isoform X2                                                              | epsb3                                                                 | F lipid binding                                                                                                                                                                                   |                                                                                                                                                                                                   |
|                                      | 26                                 | MSTRG22482.2 | contaminant 7 isoform X2                                                             | CINPT                                                                 | F protein modification process                                                                                                                                                                    |                                                                                                                                                                                                   |
|                                      | 27                                 | MSTRG22606.1 | LOW QUALITY PROTEIN: afadin-like                                                     | afadin                                                                | F cell adhesion; F signaling; F cell differentiation; F neuronal structure development                                                                                                            |                                                                                                                                                                                                   |
|                                      | 28                                 | MSTRG23117.1 | protein SMG7 isoform X8                                                              | smg7                                                                  | F protein modification process                                                                                                                                                                    |                                                                                                                                                                                                   |
|                                      | 29                                 | MSTRG23423.1 | zinc finger 644                                                                      | zif644b                                                               | F regulation of DNA template transcription; F DNA binding; F transcription regulation activity; C nucleus                                                                                         |                                                                                                                                                                                                   |
|                                      | 30                                 | MSTRG23864.2 | spidulin-W-like                                                                      | SPIDW602                                                              | F reproductive process                                                                                                                                                                            |                                                                                                                                                                                                   |
|                                      | 31                                 | MSTRG23972.1 | ...-NA...                                                                            |                                                                       |                                                                                                                                                                                                   |                                                                                                                                                                                                   |
|                                      | 32                                 | MSTRG25825.1 | phosphatase 1 regulatory subunit 26 isoform X1                                       | ppp126                                                                | F negative regulation of phosphatase activity; F protein phosphatase inhibitor activity                                                                                                           |                                                                                                                                                                                                   |
|                                      | 33                                 | MSTRG26603.2 | peroxisomal NADH pyrophosphatase NUDT12 isoform X1                                   | nudt12                                                                | F hydrolysis activity; C cytoskeleton                                                                                                                                                             |                                                                                                                                                                                                   |
|                                      | 34                                 | MSTRG26951.1 | serine/threonine-protein kinase MARK2-like isoform X9                                | mark2b                                                                | F protein modification process                                                                                                                                                                    |                                                                                                                                                                                                   |
|                                      | 35                                 | MSTRG27026.1 | adenosine 3-phosphatase 5-phosphohistidine transferase 1 isoform X2                  | C5H2C2                                                                | F cell differentiation; F transmembrane matrix organization; F neuronal structure development; F transmembrane transport; F nucleic acid metabolic process; F transmembrane activity              |                                                                                                                                                                                                   |
|                                      | 36                                 | MSTRG28080.1 | GTPase IMAP family member 8-like                                                     | LOC50863                                                              | F nucleic acid binding; F GTP binding                                                                                                                                                             |                                                                                                                                                                                                   |
|                                      | 37                                 | MSTRG32738.1 | QOR-71 isoform X1                                                                    | qorwb                                                                 | C cytoskeleton; C membrane                                                                                                                                                                        |                                                                                                                                                                                                   |
|                                      | 38                                 | MSTRG33757.2 | uncharacterized protein rmc1 isoform X2                                              | LOC558777                                                             |                                                                                                                                                                                                   |                                                                                                                                                                                                   |
|                                      | 39                                 | MSTRG33384.1 | DNA-directed RNA polymerase III subunit RPC3 isoform X1                              | pdc3c                                                                 | F DNA template transcription; F DNA binding; C nucleus                                                                                                                                            |                                                                                                                                                                                                   |
|                                      | 40                                 | MSTRG34462.1 | LOW QUALITY PROTEIN: erbb                                                            | erbb2p                                                                | F regulation of DNA template transcription; F signaling                                                                                                                                           |                                                                                                                                                                                                   |
|                                      | 41                                 | MSTRG4612.6  | RNA sensory protein 1-associated 1-like                                              | C2H46H2                                                               | F nucleic acid binding; C cellular material structure                                                                                                                                             |                                                                                                                                                                                                   |
|                                      | 42                                 | MSTRG5386.1  | transcription intermediate factor 1-alpha-like isoform X2                            | trif331                                                               | F transcription                                                                                                                                                                                   |                                                                                                                                                                                                   |
|                                      | 43                                 | MSTRG5789.3  | condolin-isoform X1                                                                  | cp                                                                    | F extracellular matrix activity; C extracellular region                                                                                                                                           |                                                                                                                                                                                                   |
|                                      | 44                                 | MSTRG6174.1  | coagulation factor XIII A-chain-like isoform X1                                      | f13ab                                                                 |                                                                                                                                                                                                   |                                                                                                                                                                                                   |
|                                      | 45                                 | MSTRG6303.1  | calcitriol-regulated protein-associated 2 isoform X3                                 | camp2                                                                 | F cell differentiation; F neuronal structure development; F cytoskeleton protein binding; C cytoskeleton                                                                                          |                                                                                                                                                                                                   |
|                                      | 46                                 | MSTRG7318.2  | F-actin-monoclonal gamma mif1 isoform X1                                             | mifc1                                                                 | F neuronal structure development; F cytoskeleton protein binding; F transmembrane activity                                                                                                        |                                                                                                                                                                                                   |
|                                      | 47                                 | MSTRG25329.2 | glutaryl-prolyl isomerase cytosolic                                                  | qpps                                                                  | F RNA metabolic process; F amino acid metabolic process; F ligase activity; F catalytic activity; acting on RNA                                                                                   |                                                                                                                                                                                                   |
|                                      | 48                                 | MSTRG7362.1  | complex 1 intermediate-associated mitochondrial                                      | ndaf1                                                                 | F generation of precursor metabolites and energy; F mitochondrial organization; F protein-containing complex assembly; C mitochondrion                                                            |                                                                                                                                                                                                   |
|                                      | 49                                 | MSTRG6992.2  | E2 ubiquitin-ligase HACE1 isoform X1                                                 | hace1                                                                 | F protein modification process; F transmembrane activity; F catalytic activity; acting on proteins                                                                                                |                                                                                                                                                                                                   |
| I2<br>down-regulated<br>genes        | 1                                  | MSTRG11227.2 | zinc finger CCHC domain-containing 7 isoform X2                                      | zncbf7                                                                | F nucleic acid binding; F zinc ion binding                                                                                                                                                        |                                                                                                                                                                                                   |
|                                      | 2                                  | MSTRG12780.1 | palmitoyltransferase ZDHHC5-like                                                     | zdh5a                                                                 | F protein modification process; F transmembrane activity; acting on a protein; C plasma membrane                                                                                                  |                                                                                                                                                                                                   |
|                                      | 3                                  | MSTRG17585.1 | serine acetyltransferase-like protein X2                                             | sera1a                                                                | F protein transmembrane; F helicase activity; F catalytic activity; acting on a protein; C mitochondrion                                                                                          |                                                                                                                                                                                                   |
|                                      | 4                                  | MSTRG17944.1 | BRD4-interacting chromatin-remodeling complex-associated-like                        | gicr11                                                                | F positive regulation of DNA template transcription; F CWSN19 complex                                                                                                                             |                                                                                                                                                                                                   |
|                                      | 5                                  | MSTRG15553.1 | protein-serine O-palmitoyltransferase procaspase-like isoform X2                     | procas                                                                | F lipid metabolic process; F signaling; F protein modification process; F transmembrane activity; C cytoplasmic vesicle                                                                           |                                                                                                                                                                                                   |
|                                      | 6                                  | MSTRG12920.1 | nucleosome-associated RP IIb family member 1-like                                    | margr1b                                                               | F transcription regulation activity; C cytoskeleton                                                                                                                                               |                                                                                                                                                                                                   |
|                                      | 7                                  | MSTRG14030.1 | nucleosome-associated gamma-lac VW and PZG domain-containing 1b isoform X1           | hace1                                                                 | F transcription activity                                                                                                                                                                          |                                                                                                                                                                                                   |
|                                      | 8                                  | MSTRG16846.2 | several antigens with cold-cell domain and onkyo repeats 1-like isoform X1           | shc472                                                                | F preproliferative cell death; F signaling; C cytoskeleton                                                                                                                                        |                                                                                                                                                                                                   |
|                                      | 9                                  | MSTRG17604.1 | dead binding subfamily B member 2 isoform X5                                         | dnb2b                                                                 |                                                                                                                                                                                                   |                                                                                                                                                                                                   |
|                                      | 10                                 | MSTRG17879.2 | very-long-chain (C18-31)-hydroxyacyl-CoA dehydrogenase 2-like isoform X1             | pyg1b                                                                 | F lipid metabolic process; F lipid activity; C cytoplasmic vesicle                                                                                                                                |                                                                                                                                                                                                   |
|                                      | 11                                 | MSTRG18773.1 | rho GTPase activating factor                                                         | ARHGAP36                                                              | F protein modification process                                                                                                                                                                    |                                                                                                                                                                                                   |
|                                      | 12                                 | MSTRG19188.2 | cytoskeleton 5-like                                                                  | stc4d                                                                 | F transmembrane protein transport; F protein-mediated transport; F transmembrane organization; F nucleic acid storage activity; C Golgi apparatus                                                 |                                                                                                                                                                                                   |
|                                      | 13                                 | MSTRG19523.2 | transcriptional regulator ATRX-like                                                  | atr                                                                   | C cytoplasm                                                                                                                                                                                       |                                                                                                                                                                                                   |
|                                      | 14                                 | MSTRG20961.2 | ...-NA...                                                                            |                                                                       |                                                                                                                                                                                                   |                                                                                                                                                                                                   |
|                                      | 15                                 | MSTRG21244.2 | serine/threonine-kinase MARK1 isoform X2                                             | zg-153725                                                             | F cytoskeleton organization; F protein modification process; F transmembrane activity; F catalytic activity; acting on a protein                                                                  |                                                                                                                                                                                                   |
|                                      | 16                                 | MSTRG21352.1 | ...-NA...                                                                            |                                                                       |                                                                                                                                                                                                   |                                                                                                                                                                                                   |
|                                      | 17                                 | MSTRG22116.2 | retinoid acid induced 1-like                                                         | LOC50882                                                              | F viral ion binding                                                                                                                                                                               |                                                                                                                                                                                                   |
|                                      | 18                                 | MSTRG23027.1 | DHS-like nucleosome 2                                                                | LOC566106                                                             | F RNA metabolic process; F RNA binding; F helicase activity; F catalytic activity; acting on RNA; C cytoplasm                                                                                     |                                                                                                                                                                                                   |
|                                      | 19                                 | MSTRG23134.1 | activated CDC42 kinase 1-like isoform X5                                             | LOC559119                                                             | F signaling; F protein modification process; F transmembrane activity; F catalytic activity; acting on a protein; C nucleus; C plasma membrane                                                    |                                                                                                                                                                                                   |
|                                      | 20                                 | MSTRG23242.1 | STRAP-like isoform X1                                                                | zg-167446                                                             | C cytoskeleton; C membrane                                                                                                                                                                        |                                                                                                                                                                                                   |
|                                      | 21                                 | MSTRG24284.2 | beta-1,2-galactosyl O-glycosyl-lyso-beta-1,6-N-acetylglucosaminyltransferase-like    |                                                                       | F transmembrane activity; F catalytic activity; acting on a protein; C Golgi apparatus                                                                                                            |                                                                                                                                                                                                   |
|                                      | 22                                 | MSTRG24889.1 | condolin-beta protein-like 1 isoform X1                                              | corlin1                                                               | F protein modification; F protein ion binding                                                                                                                                                     |                                                                                                                                                                                                   |
|                                      | 23                                 | MSTRG25242.1 | DNA damage-binding 2 isoform X3                                                      | dnb2                                                                  | F DNA repair; F damaged DNA binding; C nucleus; C-Golgi ERG1 ubiquitin ligase complex                                                                                                             |                                                                                                                                                                                                   |
|                                      | 24                                 | MSTRG25852.1 | oxytetracycline resistant LXR-alpha-like                                             | lxa                                                                   | F regulation of DNA template transcription; F lipid metabolic process; F signaling; F DNA binding; F nucleic acid metabolic activity; F transcription regulation activity; C nucleus              |                                                                                                                                                                                                   |
|                                      | 25                                 | MSTRG25769.2 | BRD1 domain-containing protein BRD1X                                                 | brd1x                                                                 |                                                                                                                                                                                                   |                                                                                                                                                                                                   |
|                                      | 26                                 | MSTRG2891.3  | NLR family CARD domain-containing 3-like isoform X2                                  | sich211-194b16.4                                                      |                                                                                                                                                                                                   |                                                                                                                                                                                                   |
|                                      | 27                                 | MSTRG31319.2 | ...-NA...                                                                            |                                                                       |                                                                                                                                                                                                   |                                                                                                                                                                                                   |
|                                      | 28                                 | MSTRG32844.1 | protein NDORG                                                                        | ndp2                                                                  | F signaling; F cell differentiation; F neuronal structure development                                                                                                                             |                                                                                                                                                                                                   |
|                                      | 29                                 | MSTRG33023.1 | two pore calcium channel 1-like isoform X6                                           | tpc1c                                                                 | F transmembrane transport; F transport activity; C cytoskeleton                                                                                                                                   |                                                                                                                                                                                                   |
|                                      | 30                                 | MSTRG33212.1 | electrogenic sodium bicarbonate cotransporter 1 isoform X3                           | slc44a4                                                               | F transmembrane transport; F transport activity                                                                                                                                                   |                                                                                                                                                                                                   |
|                                      | 31                                 | MSTRG3871.1  | chromatin protein homolog 5-like                                                     | chr5                                                                  | F regulation of DNA template transcription; F protein modification process; F transmembrane activity; F catalytic activity; acting on a protein; C nucleus                                        |                                                                                                                                                                                                   |
|                                      | 32                                 | MSTRG3971.2  | ubiquitin-conjugating enzyme E2D1-like protein 1                                     | UBR2D1.1                                                              | F protein modification process; F transmembrane activity; F catalytic activity; acting on a protein; C nucleus                                                                                    |                                                                                                                                                                                                   |
|                                      | 33                                 | MSTRG21243.1 | antitumor inhibitor 1-like isoform X1                                                | antib1                                                                | F polypurine biosynthetic process; F regulation of catalytic activity; F catalytic activity; F histidine decarboxylase activator activity                                                         |                                                                                                                                                                                                   |
|                                      | 34                                 | MSTRG4642.1  | histidine-A-inhibited gamma nucleotide exchange 2                                    | arlgf2                                                                |                                                                                                                                                                                                   |                                                                                                                                                                                                   |
|                                      | 35                                 | MSTRG10193.1 | chymotrypsin-like elastinase family member 2A                                        | elc1                                                                  | F hydrolysis activity; F catalytic activity; acting on a protein; C extracellular space                                                                                                           |                                                                                                                                                                                                   |
|                                      | 36                                 | MSTRG9152.1  | vascular 8-like isoform X1                                                           |                                                                       | F nucleic acid storage activity; C cytosol                                                                                                                                                        |                                                                                                                                                                                                   |
|                                      | 37                                 | MSTRG19414.1 | transmembrane-catalyzed 201Da translocase-like 2                                     | tg202                                                                 | F nucleic acid phosphatidyl transferase; F RNA phospholipid bond hydrolysis; F nucleic acid hydrolysis; F F-F transmembrane activity; F nucleic acid binding; F transmembrane activity            |                                                                                                                                                                                                   |
|                                      | Genistein<br>up-regulated<br>genes | 1            | MSTRG10373.1                                                                         | amide sulfotransferase-like                                           | slc1b3                                                                                                                                                                                            | F transmembrane activity                                                                                                                                                                          |
|                                      |                                    | 2            | MSTRG11770.1                                                                         | ant-GAP with Rho-GAP-ANK repeat and PH domain-containing 3 isoform X1 | arg3                                                                                                                                                                                              | F signaling; F neuronal structure development; F transmembrane function regulation activity                                                                                                       |
|                                      |                                    | 3            | MSTRG20743.1                                                                         | ATP-binding cassette sub-family C member 9 isoform X1                 | abc9                                                                                                                                                                                              | F transmembrane transport; F transport activity; F nucleic acid metabolic activity; F ATP-dependent activity                                                                                      |
|                                      |                                    | 4            | MSTRG11158.1                                                                         | ATP-dependent DNA helicas Q1 isoform X2                               | rmn47                                                                                                                                                                                             | F DNA replication; F DNA repair; F DNA recombination; F helicase activity; F catalytic activity; acting on DNA; F ATP-ATP-dependent activity; C nucleus                                           |
|                                      |                                    | 5            | MSTRG12920.1                                                                         | glutaryl-prolyl isomerase cytosolic                                   | qpps                                                                                                                                                                                              | F RNA metabolic process; F amino acid metabolic process; F ligase activity; F catalytic activity; acting on RNA                                                                                   |
|                                      |                                    | 6            | MSTRG6300.1                                                                          | calcitriol-regulated protein-associated 2 isoform X3                  | camp2                                                                                                                                                                                             | F cell differentiation; F neuronal structure development; F cytoskeleton protein binding; C cytoskeleton                                                                                          |
|                                      |                                    | 7            | MSTRG22482.2                                                                         | contaminant 7 isoform X2                                              | CINPT                                                                                                                                                                                             | F protein modification process                                                                                                                                                                    |
|                                      |                                    | 8            | MSTRG20758.1                                                                         | class II basic helix-loop-helix 41 isoform X2                         | Mbhl41                                                                                                                                                                                            | F regulation of DNA template transcription; F cell differentiation; F neuronal structure development; F DNA binding; F transcription regulation activity                                          |
|                                      |                                    | 9            | MSTRG7362.1                                                                          | complex 1 intermediate-associated mitochondrial                       | ndaf1                                                                                                                                                                                             | F generation of precursor metabolites and energy; F mitochondrial organization; F protein-containing complex assembly; C mitochondrion                                                            |
|                                      |                                    | 10           | MSTRG10806.1                                                                         | corin-6                                                               | cor6                                                                                                                                                                                              | F protein modification; F protein modification process; F protein-containing complex assembly; F cytoskeleton protein binding; F helicase activity; F catalytic activity; acting on a protein     |
|                                      |                                    | 11           | MSTRG22603.1                                                                         | domain-specific sulfatase isoform X1                                  | dsu                                                                                                                                                                                               | F transmembrane activity                                                                                                                                                                          |
|                                      |                                    | 12           | MSTRG12383.1                                                                         | epsin type A-membrane 3-like isoform X1                               | epb1                                                                                                                                                                                              | F protein modification process; F transmembrane activity; F nucleic acid metabolic activity; F catalytic activity; acting on a protein; C plasma membrane                                         |
| 13                                   |                                    | MSTRG24421.2 | glutamine-fructose-6-phosphate aminotransferase [isomerizing] 2-like isoform X1      | gfr2                                                                  | F protein modification process; F transmembrane transport; F nucleic acid metabolic process; F nucleic acid metabolic process; F nucleic acid metabolic process; F nucleic acid metabolic process |                                                                                                                                                                                                   |
| 14                                   |                                    | MSTRG20603.1 | GTPase IMAP family member 8-like                                                     | LOC50863                                                              | F nucleic acid binding; F GTP binding                                                                                                                                                             |                                                                                                                                                                                                   |
| 15                                   |                                    | MSTRG25782.1 | histidine-binding isoform X1                                                         | aid10                                                                 | F acetyltransferase activity                                                                                                                                                                      |                                                                                                                                                                                                   |
| 16                                   |                                    | MSTRG11971.1 | histidine-N-acetyl transferase-like                                                  | aid10                                                                 | F acetyltransferase activity                                                                                                                                                                      |                                                                                                                                                                                                   |
| 17                                   |                                    | MSTRG25462.2 | hormone-sensitive lipase isoform X3                                                  | lipb                                                                  |                                                                                                                                                                                                   |                                                                                                                                                                                                   |
| 18                                   |                                    | MSTRG22947.1 | isoheme-2                                                                            | iso2a                                                                 |                                                                                                                                                                                                   |                                                                                                                                                                                                   |
| 19                                   |                                    | MSTRG10512.1 | L-aminoadipate-oxidomethyl de dehydrogenase-phosphoantithetyl transferase            | aaodyp1                                                               | F amino acid metabolic process; F protein modification process; F transmembrane activity; C cytosol                                                                                               |                                                                                                                                                                                                   |
| 20                                   |                                    | MSTRG12628.1 | LIM and calponin homology domains-containing 1-like                                  | limb3b                                                                |                                                                                                                                                                                                   |                                                                                                                                                                                                   |
| 21                                   |                                    | MSTRG14542.1 | LOW QUALITY PROTEIN: angiotensin                                                     | anot                                                                  | F establishment or maintenance of cell polarity; F neuronal structure development; F cell motility                                                                                                |                                                                                                                                                                                                   |
| 22                                   |                                    | MSTRG24573.1 | myosin A subunit beta-like isoform X1                                                | myb1b                                                                 | F protein modification; F catalytic activity; acting on a protein                                                                                                                                 |                                                                                                                                                                                                   |
| 23                                   |                                    | MSTRG15612.1 | myosin phosphatase 1 regulatory subunit 2b isoform X2                                | myo126                                                                | F RNA metabolic process; F RNA binding; F transmembrane activity; C cytoskeleton; C mitochondrion; C cytoskeleton                                                                                 |                                                                                                                                                                                                   |
| 24                                   |                                    | MSTRG25825.1 | myosin isoform X2                                                                    | MYOCD                                                                 |                                                                                                                                                                                                   |                                                                                                                                                                                                   |
| 25                                   |                                    | MSTRG4281.1  | myosin isoform X6                                                                    | MYOCD                                                                 |                                                                                                                                                                                                   |                                                                                                                                                                                                   |
| 26                                   |                                    | MSTRG10612.1 | ...-NA...                                                                            |                                                                       |                                                                                                                                                                                                   |                                                                                                                                                                                                   |
| 27                                   |                                    | MSTRG12523.4 | ...-NA...                                                                            |                                                                       |                                                                                                                                                                                                   |                                                                                                                                                                                                   |
| 28                                   |                                    | MSTRG26706.2 | ...-NA...                                                                            |                                                                       |                                                                                                                                                                                                   |                                                                                                                                                                                                   |
| 29                                   |                                    | MSTRG11778.1 | nucleic factor of activated T-lymphocyte 5-like isoform X2                           | NFATY3                                                                | F regulation of DNA template transcription; F signaling; F DNA binding; F transcription regulation activity                                                                                       |                                                                                                                                                                                                   |
| 30                                   |                                    | MSTRG10778.1 | phosphatase 1 regulatory subunit 26 isoform X1                                       | ppp126                                                                | F negative regulation of phosphatase activity; F protein phosphatase inhibitor activity                                                                                                           |                                                                                                                                                                                                   |
| 31                                   |                                    | MSTRG15061.1 | PREDICTED: uncharacterized protein C1orf57 homolog                                   | zg-161339                                                             |                                                                                                                                                                                                   |                                                                                                                                                                                                   |
| 32                                   |                                    | MSTRG12596.1 | PREDICTED: uncharacterized protein LOC109964525 isoform X42                          |                                                                       |                                                                                                                                                                                                   |                                                                                                                                                                                                   |
| 33                                   |                                    | MSTRG14401.1 | proteoglycan coreceptor type 2                                                       | PF                                                                    | F regulation of DNA template transcription; F DNA binding; F transcription regulation activity; C nucleus                                                                                         |                                                                                                                                                                                                   |
| 34                                   |                                    | MSTRG23905.2 | proline-rich 12                                                                      | LOC557848                                                             |                                                                                                                                                                                                   |                                                                                                                                                                                                   |
| 35                                   |                                    | MSTRG11179.1 | protein artemis                                                                      | daric1                                                                | C nucleus                                                                                                                                                                                         |                                                                                                                                                                                                   |
| 36                                   |                                    | MSTRG10911.1 | proteasomal alpha-3-like isoform X13                                                 | pab2ac                                                                |                                                                                                                                                                                                   |                                                                                                                                                                                                   |
| 37                                   |                                    | MSTRG13781.1 | QOR-71 isoform X1                                                                    | qorwb                                                                 | C cytoskeleton; C membrane                                                                                                                                                                        |                                                                                                                                                                                                   |
| 38                                   |                                    | MSTRG10827.3 | RNA-binding 14b isoform X3                                                           | thc14b                                                                | F RNA binding                                                                                                                                                                                     |                                                                                                                                                                                                   |
| 39                                   |                                    | MSTRG10894.1 | TBC1 domain family member 9b isoform X2                                              | thc149                                                                | F calcium ion binding                                                                                                                                                                             |                                                                                                                                                                                                   |
| 40                                   |                                    | MSTRG13861.1 | transcription intermediate factor 1-alpha-like isoform X2                            | trif331                                                               |                                                                                                                                                                                                   |                                                                                                                                                                                                   |
| 41                                   |                                    | MSTRG6243.2  | uncharacterized protein sich211-161b7.4 isoform X1                                   | sich211-161b7.4                                                       |                                                                                                                                                                                                   |                                                                                                                                                                                                   |
| 42                                   |                                    | MSTRG26034.1 | uncharacterized protein sich73-30B9.1                                                |                                                                       |                                                                                                                                                                                                   |                                                                                                                                                                                                   |
| 43                                   |                                    | MSTRG11947.1 | Y-box-binding 2 isoform X2                                                           | ybb1                                                                  | F nucleic acid binding                                                                                                                                                                            |                                                                                                                                                                                                   |
| 44                                   |                                    | MSTRG2715.1  | zinc finger 501-like                                                                 | zif501b                                                               |                                                                                                                                                                                                   |                                                                                                                                                                                                   |
| 45                                   |                                    | MSTRG19144.2 | zinc phosphatase domain-binding 3-like                                               | zif612                                                                | F reproductive process; F cell differentiation; F neuronal structure development; F neuronal structure development; F neuronal structure development; F neuronal structure development            |                                                                                                                                                                                                   |
| Genistein<br>down-regulated<br>genes |                                    | 1            | MSTRG16042.1                                                                         | 60S ribosomal protein L18                                             | rlp18                                                                                                                                                                                             | F translation                                                                                                                                                                                     |
|                                      |                                    | 2            | MSTRG15554.1                                                                         | C-S-C domain transmembrane type 4k                                    | cur4a                                                                                                                                                                                             | F transmembrane transport; F signaling; F cell differentiation; F neuronal structure development; F cell motility; F nucleic acid metabolic process; C cytoskeleton; C plasma membrane            |
|                                      |                                    | 3            | MSTRG11770.1                                                                         | ant-GAP with Rho-GAP-ANK repeat and PH domain-containing protein 3    | arg3                                                                                                                                                                                              | F signaling; F protein modification process; F lipid binding; F transcription regulation activity                                                                                                 |
|                                      |                                    | 4            | MSTRG14741.2                                                                         | A-kinase anchor protein 13-like                                       | akp13                                                                                                                                                                                             | F protein modification; F protein ion binding; F regulation of catalytic activity; F F-ATP-dependent protein kinase activity; F signal transduction; F signal transduction; F signal transduction |
|                                      | 5                                  | MSTRG14239.1 | serine/threonine monooxygenase FMO G8/GX-like 4                                      | LOC793236                                                             | F transmembrane activity; C cytoplasm                                                                                                                                                             |                                                                                                                                                                                                   |
|                                      | 6                                  | MSTRG14962.1 | insulin-like growth factor 5-phosphohistidine transferase K isoform X1               | phs1a                                                                 | F lipid metabolic process; F hydrolysis activity                                                                                                                                                  |                                                                                                                                                                                                   |
|                                      | 7                                  | MSTRG19188.2 | cytoskeleton 5-like                                                                  | stc4d                                                                 | F transmembrane protein transport; F protein-mediated transport; F transmembrane organization; F nucleic acid storage activity; C Golgi apparatus                                                 |                                                                                                                                                                                                   |
|                                      | 8                                  | MSTRG20743.1 | ATP-binding cassette sub-family C member 9 isoform X1                                | abc9                                                                  | F transmembrane transport; F transport activity; F nucleic acid metabolic activity; F ATP-dependent activity                                                                                      |                                                                                                                                                                                                   |
|                                      | 9                                  | MSTRG23112.1 | ribosome biogenesis protein BM51 homolog isoform X2                                  | bm11                                                                  | F ribosome biogenesis; C nucleus                                                                                                                                                                  |                                                                                                                                                                                                   |
|                                      | 10                                 | MSTRG22564.4 | ...-NA...                                                                            |                                                                       |                                                                                                                                                                                                   |                                                                                                                                                                                                   |
|                                      | 11                                 | MSTRG25652.1 | oxytetracycline resistant LXR-alpha-like                                             | lxa1b3                                                                | F regulation of DNA template transcription; F lipid metabolic process; F signaling; F DNA binding; F nucleic acid metabolic activity; F transcription regulation activity; C nucleus              |                                                                                                                                                                                                   |
|                                      | 12                                 | MSTRG22778.1 | N-acetylglucosaminidase beta-1,3-N-acetylglucosaminyltransferase 2                   | ngt2b                                                                 | F protein glycosylation; F transmembrane activity; C Golgi apparatus                                                                                                                              |                                                                                                                                                                                                   |
|                                      | 13                                 | MSTRG24573.1 | myosin phosphatase 1 regulatory subunit 2b isoform X2                                | myo126                                                                | F negative regulation of phosphatase activity; F protein phosphatase inhibitor activity                                                                                                           |                                                                                                                                                                                                   |
|                                      | 14                                 | MSTRG20829.4 | protein ABHD18                                                                       | C14H44d29                                                             |                                                                                                                                                                                                   |                                                                                                                                                                                                   |
|                                      | 15                                 | MSTRG27512.1 | alpha-mannosidase 2C1                                                                |                                                                       |                                                                                                                                                                                                   |                                                                                                                                                                                                   |
|                                      | 16                                 | MSTRG3093.1  | ...-NA...                                                                            |                                                                       |                                                                                                                                                                                                   |                                                                                                                                                                                                   |
|                                      | 17                                 | MSTRG12651.1 | NLR family CARD domain-containing protein 3-like                                     | wn                                                                    | F hydrolysis activity; F ATP-dependent activity                                                                                                                                                   |                                                                                                                                                                                                   |
|                                      | 18                                 | MSTRG34952.1 | Werner syndrome ATP-dependent helicase isoform X1                                    | C2H46f22                                                              |                                                                                                                                                                                                   |                                                                                                                                                                                                   |
|                                      | 19                                 | MSTRG16652.1 | UPF049F homolog C5orf22 homolog                                                      | MTRF1                                                                 | F regulation of DNA template transcription; F nucleic acid metabolic process; F nucleic acid metabolic process; F DNA binding; C mitochondrion                                                    |                                                                                                                                                                                                   |
|                                      | 20                                 | MSTRG5771.2  | transcriptional activator factor 1-mitochondrial                                     | cor33a                                                                | F regulation of DNA template transcription; F lipid binding; F catalytic activity                                                                                                                 |                                                                                                                                                                                                   |
|                                      | 21                                 | MSTRG29242.1 | cytochrome P-450 2C19-like isoform X1                                                | cor33a                                                                | F regulation of DNA template transcription; F lipid binding; F catalytic activity                                                                                                                 |                                                                                                                                                                                                   |
|                                      | 22                                 | MSTRG6093.2  | ubiquitin and EGR-like domain-containing protein 1                                   | snd1                                                                  | F cell adhesion; F cell differentiation; F neuronal structure development                                                                                                                         |                                                                                                                                                                                                   |
|                                      | 23                                 | MSTRG6083.2  | uncharacterized protein LOC15112382 isoform X4                                       |                                                                       |                                                                                                                                                                                                   |                                                                                                                                                                                                   |
|                                      | 24                                 | MSTRG8602.1  | five fatty acid receptor 2-like                                                      | sich73-90p23.1                                                        | F signaling; F nucleic acid metabolic activity                                                                                                                                                    |                                                                                                                                                                                                   |
|                                      | 25                                 | MSTRG8682.2  | cytoplasmic-associated protein 23-like isoform X1                                    | zg-56072                                                              | F vesicle-mediated transport; F signaling; F transmembrane organization; F protein-containing complex assembly; F nucleic acid storage activity; C cytoplasm; C membrane                          |                                                                                                                                                                                                   |
|                                      | 26                                 | MSTRG9229.1  | tubulin gamma and delta complex protein 1                                            | LOC750754                                                             |                                                                                                                                                                                                   |                                                                                                                                                                                                   |
|                                      | 27                                 | MSTRG4612.6  | histidine-binding isoform X1                                                         | aid10                                                                 |                                                                                                                                                                                                   |                                                                                                                                                                                                   |

(A)

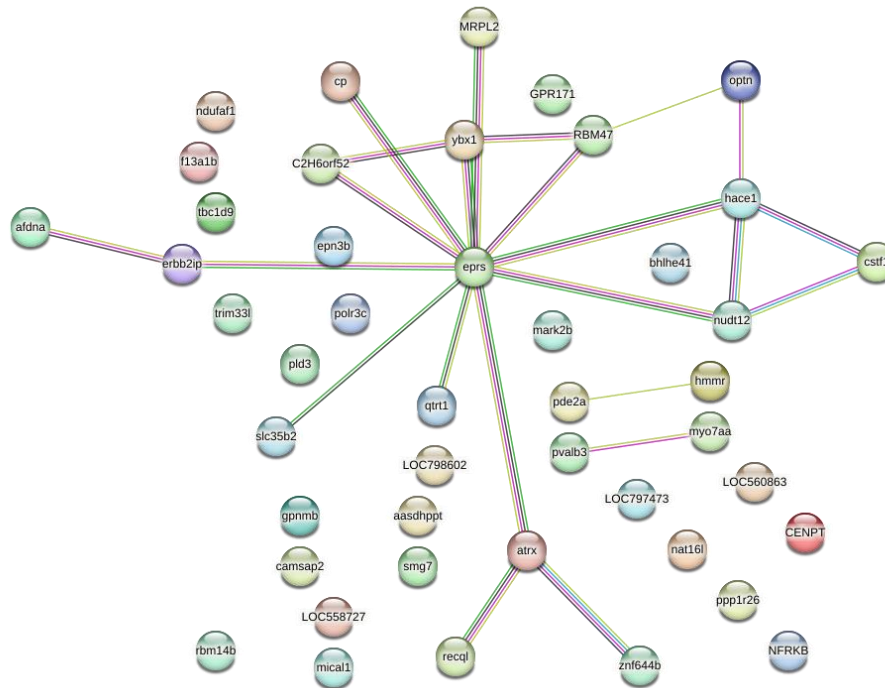

(B)

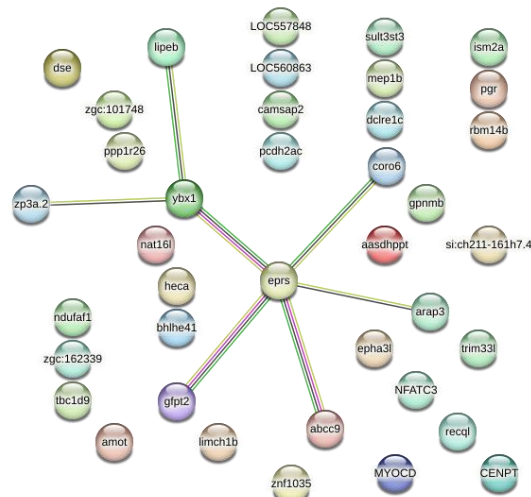

: From curated databases  
 : Experimentally determined  
 : Gene neighborhood  
 : Gene fusions  
 : Gene co-occurrence  
 : Textmining  
 : Co-expression  
 : Protein homology

**Supplementary Figure S1.** Functional and physiological networks visualized by STRING.

(A) Functional and physiological networks within the 49 genes up-regulated by E2

(B) Functional and physiological networks within the 45 genes up-regulated by Genistein
